# Supplementary material for: On-preventing and Mitigating of Leaking Secrets in AES By Side-Channel Attacks-Countermeasure
Source: Research Square preprint supplement (doi:10.21203/rs.3.rs-8564307/v1), 2026-02-09
Supplement: Supplementary file 1 [file ae919ac94b7a8c9632dc854c.xlsx]

## Sheet: Serial Test
Test Sample	AES-Hybridization P-value	Original AES P-value (calculated)
1	0.589	0.2945
2	0.7068	0.3534
3	0.8871	0.44355
4	0.9281	0.46405
5	0.7937	0.39685
6	0.3558	0.1779
7	0.6506	0.3253
8	0.3202	0.1601
9	0.1562	0.0781
10	0.3048	0.1524

## Sheet: Approximate Entropy Test
Test Sample	AES-Hybridization P-value	Original AES P-value (calculated)
1	0.0514	0.0257
2	0.8241	0.41205
3	0.6518	0.3259
4	0.5592	0.2796
5	0.7198	0.3599
6	0.8013	0.40065
7	0.1325	0.06625
8	0.1934	0.0967
9	0.4683	0.23415
10	0.7019	0.35095

## Sheet: Runs Test
Test Sample	AES-Hybridization P-value	Original AES P-value (calculated)
1	0.5081	0.11706
2	0.7665	0.117053
3	0.8945	0.117064
4	0.8782	0.117064
5	0.4174	0.117073
6	0.2268	0.117034
7	0.1222	0.11705
8	0.2389	0.117039
9	0.5077	0.117065
10	0.3479	0.117055

## Sheet: Binary Matrix Rank Test
Test Sample	AES-Hybridization P-value	Original AES P-value (calculated)
1	0.975	0.172768
2	0.9852	0.172751
3	0.9061	0.172765
4	0.542	0.172749
5	0.9809	0.172767
6	0.7449	0.172758
7	0.1823	0.17278
8	0.3507	0.172767
9	0.4436	0.172768
10	0.5286	0.172751

## Sheet: Random Excursions Variant Test
Test Sample	AES-Hybridization P-value	Original AES P-value (calculated)
1	0.4708	0.328748
2	0.3525	0.328702
3	0.4627	0.328692
4	0.6999	0.328715
5	0.4524	0.328707
6	0.463	0.328695
7	0.4292	0.328713
8	0.4997	0.32875
9	0.7232	0.328712
10	0.4516	0.328747
